# Supplementary material for: Imaging and Characterization of Oxidative Protein Modifications in Skin
Source: Int J Mol Sci. 2023 Feb 16;24(4):3981. doi: 10.3390/ijms24043981 (PMC9959078; doi:10.3390/ijms24043981)
Supplement: Supplementary file 1 [file ijms-24-03981-s001.zip › ijms-2186671-supplementary.pdf]

## Anti-MDA blot: Porcine samples

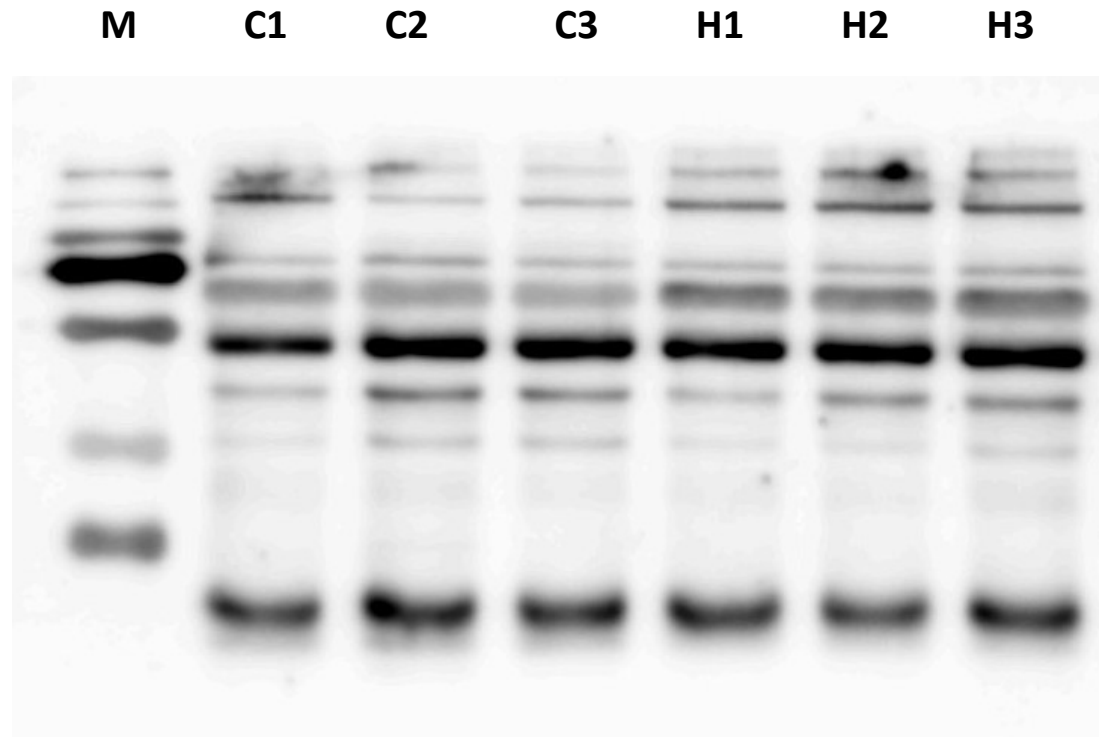

**C1-C3:** Control samples

**H1-H3:** H<sub>2</sub>O<sub>2</sub> treated samples

## Anti-DNPH blot: Porcine samples

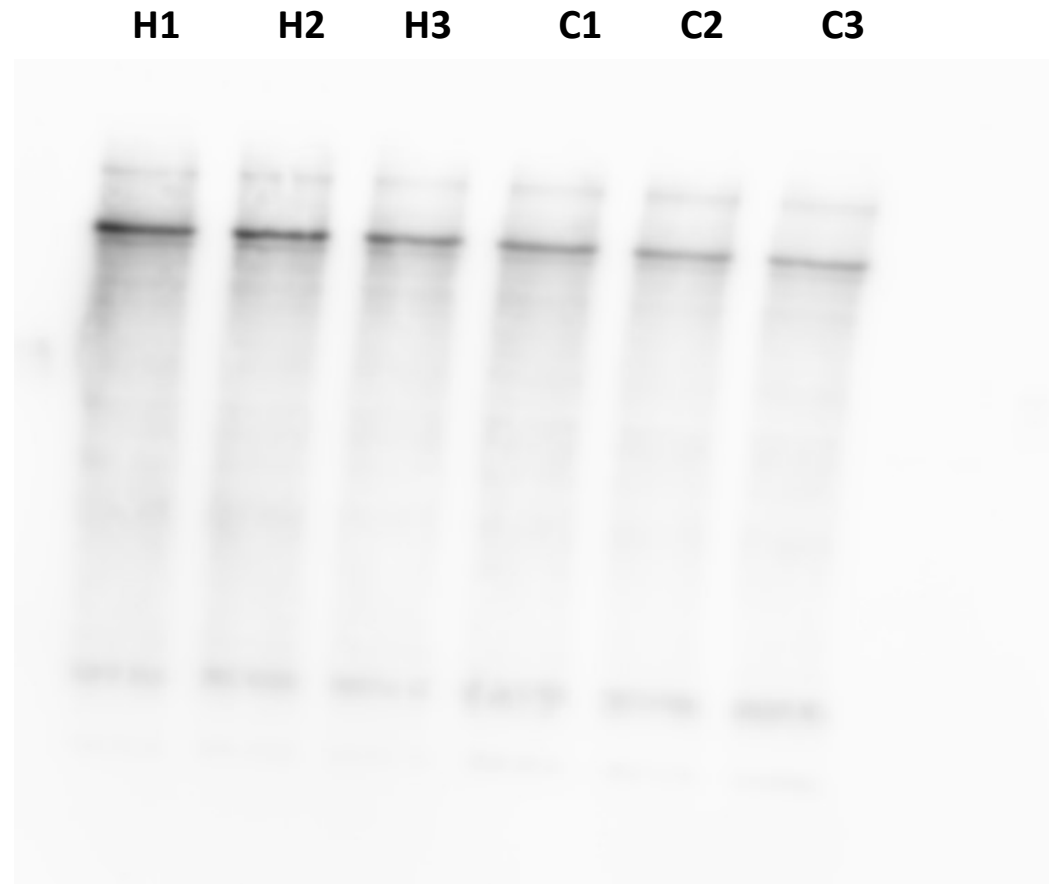

**C1-C3:** Control samples

**H1-H3:**  $\text{H}_2\text{O}_2$  treated samples
